# Supplementary material for: Chemotherapeutic effect of a novel temozolomide analog on nasopharyngeal carcinoma in vitro and in vivo
Source: PubMed Central journal article supplement (PMC4539921; doi:10.1186/s12929-015-0175-6), 2015-08-19

## **SUPPLEMENTARY DATA (Tables and Figure)**

- **Supplementary Table 1: Results from liver function test (SuperChem).**
- **Supplementary Table 2: Results from complete blood count (CBC).**
- **Supplementary Table 3: Results from complete blood count (differential).**
- **Supplementary Figure S1. Histopathological organ analysis.**

**Supplementary Table 1: Results from liver function test (SuperChem).**

Shown are values from individual Balb/c mice (without xenotransplanted tumor cells). Three animals remained untreated; three animals received vehicle; three animals received 30 mg/kg NEO212; three animals received 60 mg/kg NEO212. Treatment was via subcutaneous injection once daily for 7 consecutive days. Eleven days after the end of the treatment cycle, animals were euthanized and blood was collected.

Blood samples were analyzed by SuperChem, a comprehensive blood chemistry panel that provides a good overview of many of the body's functions. Besides the liver function values summarized below, several additional physiological parameters were analyzed; however, no significant differences were found between the groups of NEO212-treated animals and those that did not receive the drug.

| <b>Component</b>     | <b>Untreated</b> | <b>Vehicle</b> | <b>NEO212<br/>30*</b> | <b>NEO212<br/>60*</b> |
|----------------------|------------------|----------------|-----------------------|-----------------------|
| ALT<br>(IU/L)        | 42               | 26             | 27                    | 30                    |
|                      | 42               | 30             | 27                    | 34                    |
|                      | 42               | 51             | 34                    | 57                    |
| AST<br>(IU/L)        | 98               | 68             | 84                    | 76                    |
|                      | 118              | 120            | 84                    | 138                   |
|                      | 162              | 369            | 180                   | 144                   |
| ALP<br>(IU/L)        | 86               | 69             | 84                    | 72                    |
|                      | 104              | 75             | 84                    | 74                    |
|                      | 126              | 90             | 90                    | 108                   |
| Bilirubin<br>(mg/dL) | 0.2              | 0.1            | 0.2                   | 0.2                   |
|                      | 0.2              | 0.2            | 0.3                   | 0.2                   |
|                      | 0.3              | 0.3            | 0.3                   | 0.3                   |

\* mg/kg

ALT: alanine transaminase; AST: aspartate transaminase; ALP: alkaline phosphatase. All numbers are arranged by increasing values in each group.

**Supplementary Table 2: Results from complete blood count (CBC).**

Shown are values from individual Balb/c mice (without xenotransplanted tumor cells). Three animals remained untreated; three animals received vehicle; three animals received 30 mg/kg NEO212; three animals received 60 mg/kg NEO212. Treatment was via subcutaneous injection once daily for 7 consecutive days. Eleven days after the end of the treatment cycle, animals were euthanized and blood was collected.

| <b>Component</b>              | <b>Untreated</b> | <b>Vehicle</b> | <b>NEO212<br/>30*</b> | <b>NEO212<br/>60*</b> |
|-------------------------------|------------------|----------------|-----------------------|-----------------------|
| WBC<br>(x10 <sup>3</sup> /uL) | 1.5              | 1.5            | 3.2                   | 1.6                   |
|                               | 1.9              | 1.5            | 4.0                   | 2.0                   |
|                               | 2.1              | 2.5            | 5.6                   | 2.9                   |
| RBC<br>(x10 <sup>6</sup> /uL) | 7.0              | 8.4            | 7.6                   | 8.1                   |
|                               | 7.6              | 8.6            | 8.1                   | 8.6                   |
|                               | 9.4              | 9.5            | 8.9                   | 8.8                   |
| HGB<br>(g/dL)                 | 13.7             | 14.5           | 14.2                  | 14.5                  |
|                               | 13.9             | 14.6           | 14.9                  | 14.6                  |
|                               | 15.4             | 15.4           | 15.0                  | 14.8                  |
| HCT<br>(%)                    | 43               | 48             | 46                    | 49                    |
|                               | 46               | 51             | 48                    | 51                    |
|                               | 55               | 55             | 52                    | 51                    |

\* mg/kg

WBC: white blood cells; RBC: red blood cells; HGB: hemoglobin; HCT: hematocrit.  
All numbers are arranged by increasing values in each group.

**Supplementary Table 3: Results from complete blood count (CBC) with differential**

Shown are values from individual Balb/c mice (without xenotransplanted tumor cells). Three animals remained untreated; three animals received vehicle; three animals received 30 mg/kg NEO212; three animals received 60 mg/kg NEO212. Treatment was via subcutaneous injection once daily for 7 consecutive days. Eleven days after the end of the treatment cycle, animals were euthanized and blood was collected.

Absolute numbers:

| <b>Component</b>                      | <b>Untreated</b> | <b>Vehicle</b> | <b>NEO212<br/>30*</b> | <b>NEO212<br/>60*</b> |
|---------------------------------------|------------------|----------------|-----------------------|-----------------------|
| Neutrophils<br>(x10 <sup>3</sup> /uL) | 0.19             | 0.30           | 0.32                  | 0.34                  |
|                                       | 0.29             | 0.35           | 0.40                  | 0.38                  |
|                                       | 0.60             | 0.38           | 1.40                  | 0.55                  |
| Lymphocytes<br>(x10 <sup>3</sup> /uL) | 0.75             | 1.05           | 2.53                  | 1.17                  |
|                                       | 1.63             | 1.10           | 3.36                  | 1.56                  |
|                                       | 1.76             | 1.95           | 3.42                  | 2.12                  |
| Monocytes<br>(per uL)                 | 42               | 30             | 40                    | 0                     |
|                                       | 76               | 105            | 224                   | 128                   |
|                                       | 105              | 225            | 560                   | 145                   |
| Eosinophiles<br>(per uL)              | 0                | 0              | 96                    | 0                     |
|                                       | 0                | 0              | 200                   | 60                    |
|                                       | 45               | 25             | 224                   | 87                    |

Percent values:

| <b>Component</b>    | <b>Untreated</b> | <b>Vehicle</b> | <b>NEO212<br/>30*</b> | <b>NEO212<br/>60*</b> |
|---------------------|------------------|----------------|-----------------------|-----------------------|
| Neutrophils<br>(%)  | 10               | 12             | 10                    | 19                    |
|                     | 14               | 23             | 10                    | 19                    |
|                     | 40               | 25             | 25                    | 19                    |
| Lymphocytes<br>(%)  | 50               | 70             | 61                    | 73                    |
|                     | 84               | 73             | 79                    | 73                    |
|                     | 86               | 78             | 84                    | 78                    |
| Monocytes<br>(%)    | 2                | 2              | 1                     | 0                     |
|                     | 4                | 7              | 7                     | 5                     |
|                     | 7                | 9              | 10                    | 8                     |
| Eosinophiles<br>(%) | 0                | 0              | 3                     | 0                     |
|                     | 0                | 0              | 4                     | 3                     |
|                     | 3                | 1              | 5                     | 3                     |

\* mg/kg

All numbers are arranged by increasing values in each group.

**Supplementary Figure S1.** Histopathological organ analysis.

At the end of the in vivo experiment presented in Fig. 7, several animals from vehicle-treated and NEO212-treated groups were euthanized, and organs were collected for histopathological analysis. Organs were placed in 10% formalin for 24-48 hours. Thereafter, tissues were embedded in paraffin and cut into sections of 5 microns thickness. Slides were then stained using standard hematoxylin-eosin (H&E) stains, and evaluated under a light microscope. Representative photos are shown; no signs of organ damage could be detected in animals treated with NEO212.

Supplementary Figure S1

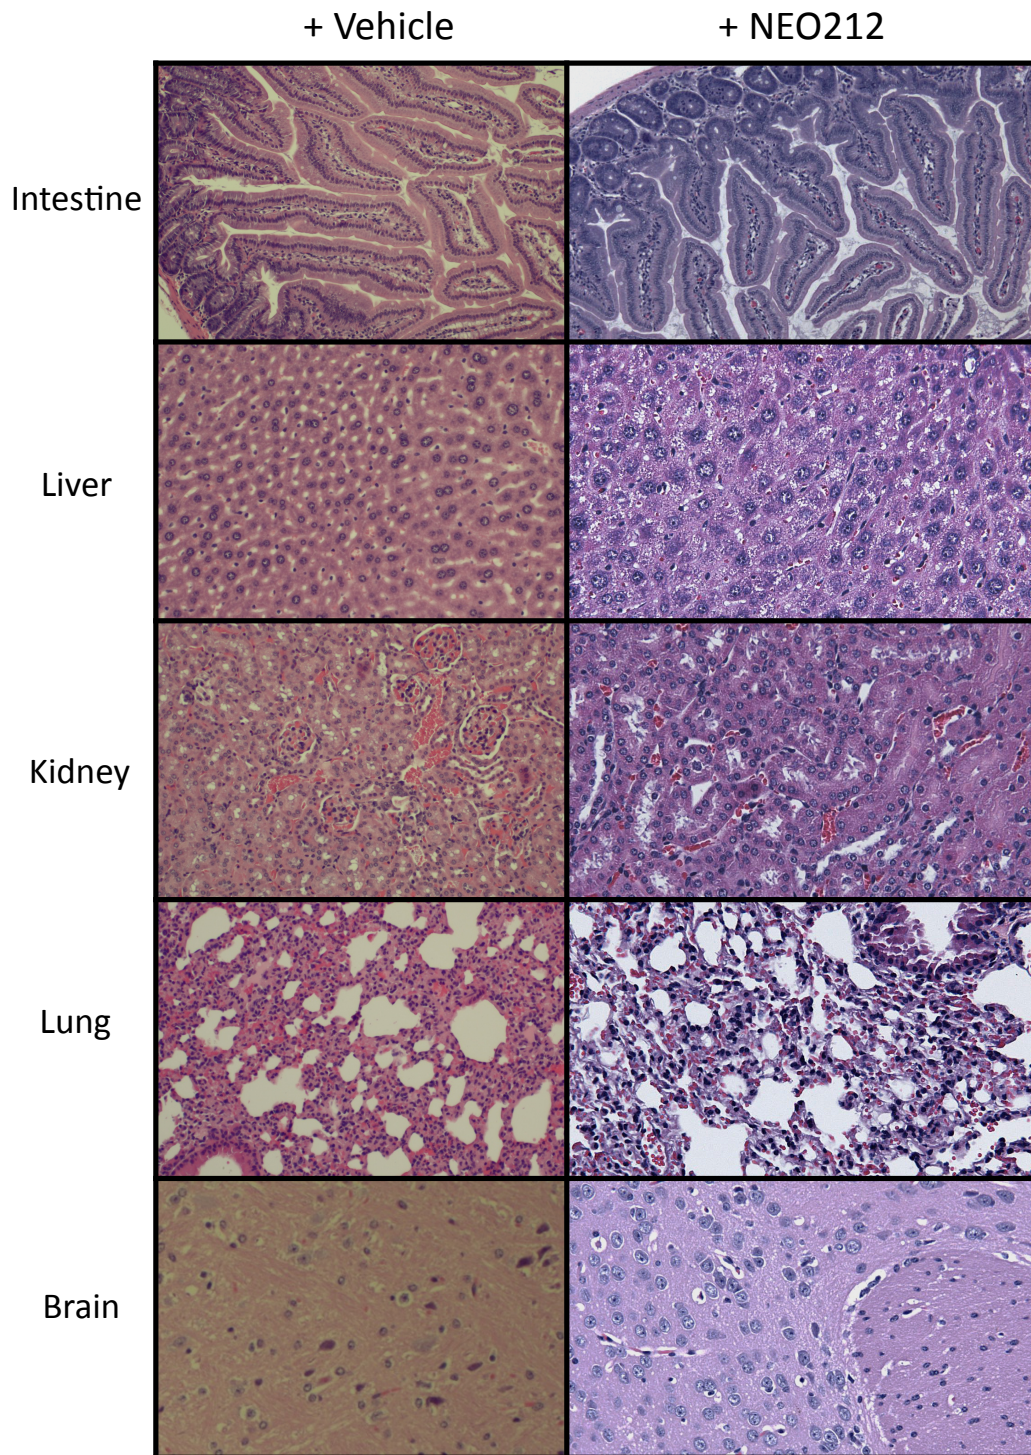

Supplement: 12929_2015_175_MOESM1_ESM.pdf [file 12929_2015_175_MOESM1_ESM.pdf]
